# Supplementary material
Source: PubMed Central journal article supplement (PMC6093212)

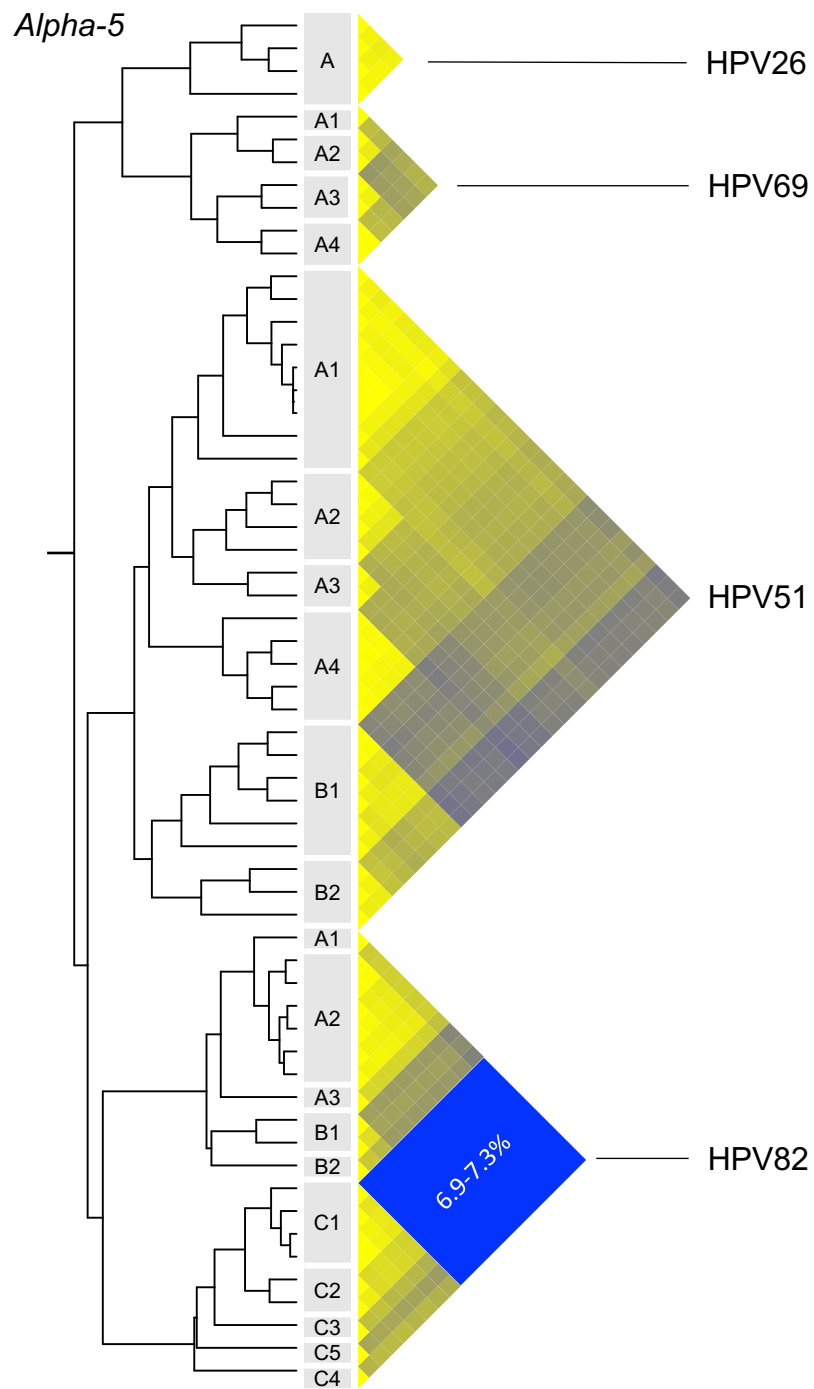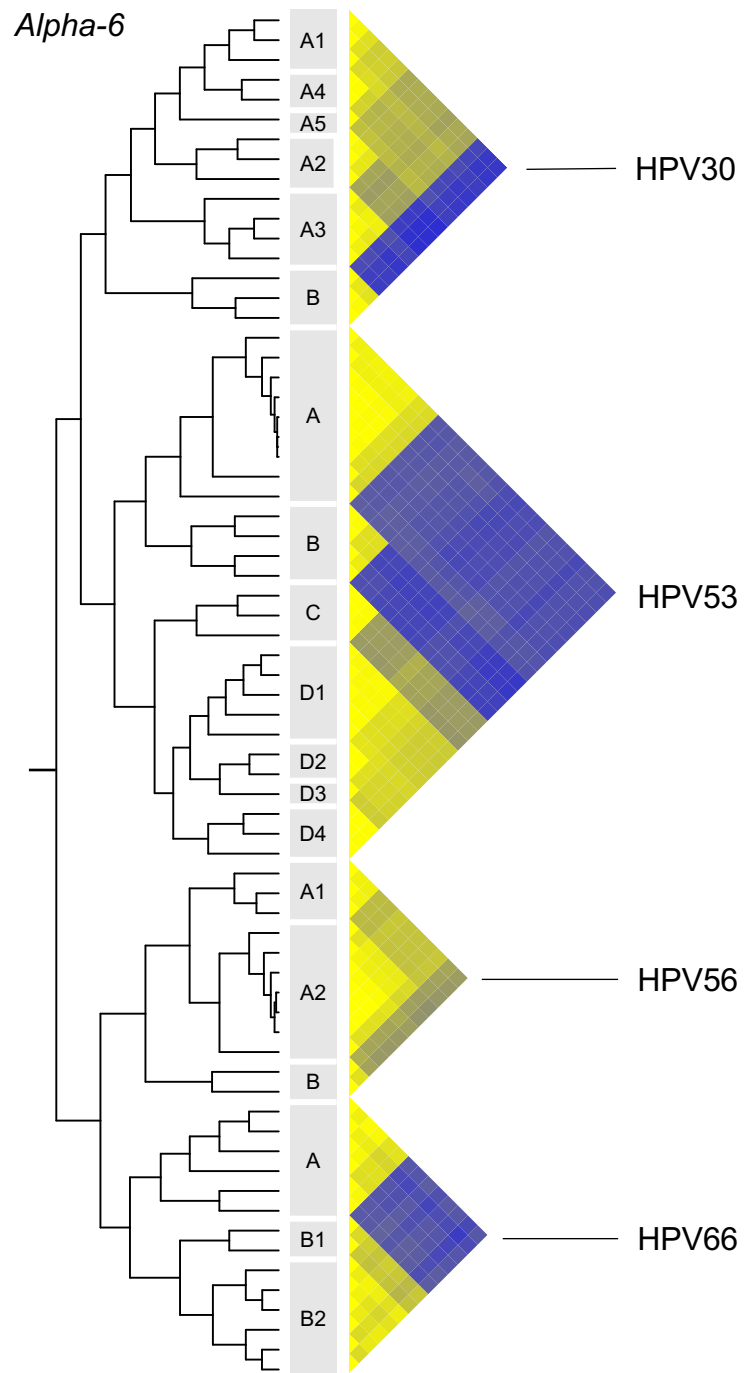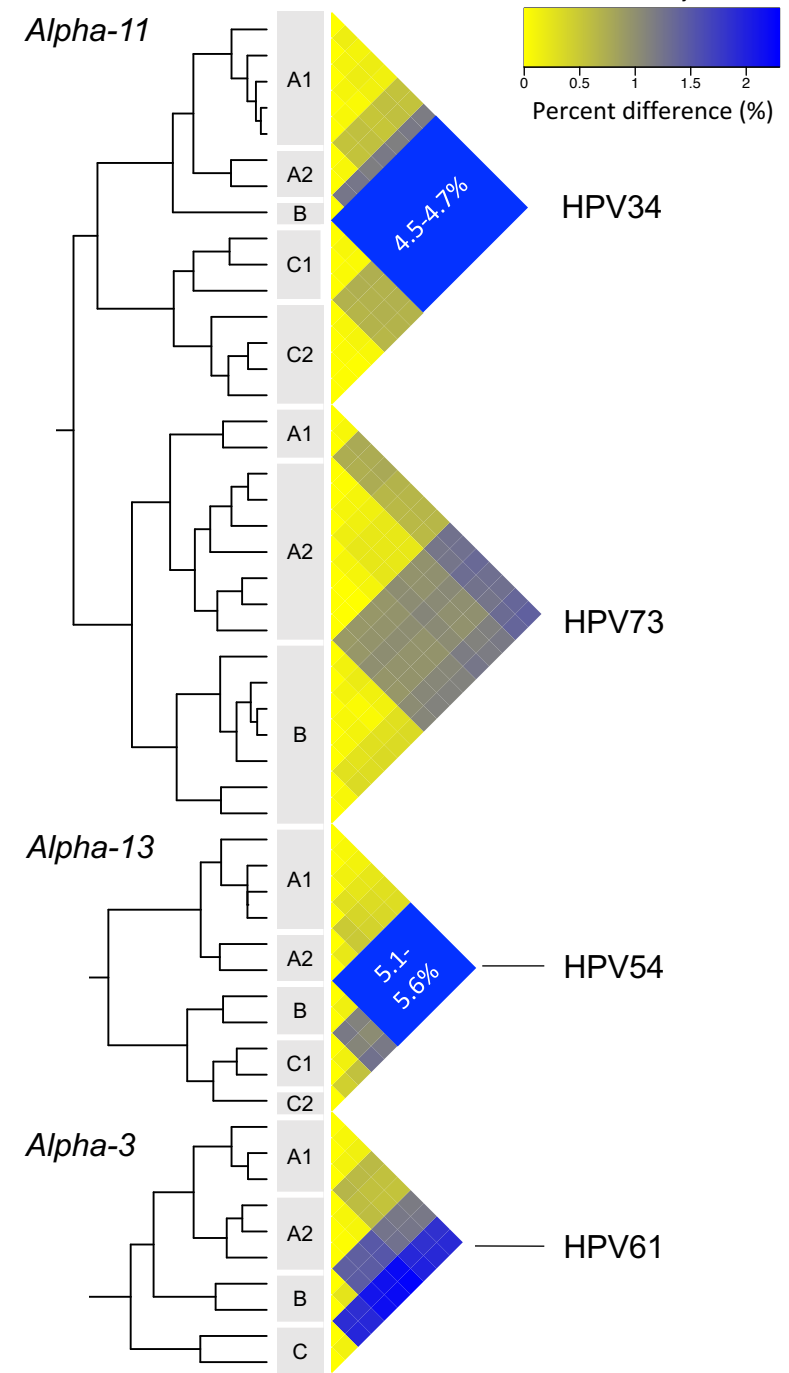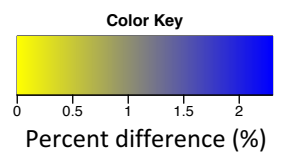

Supplement: NIHMS934365-supplement-1.pdf [file NIHMS934365-supplement-1.pdf]

Accumulated amino acid diversity (%)

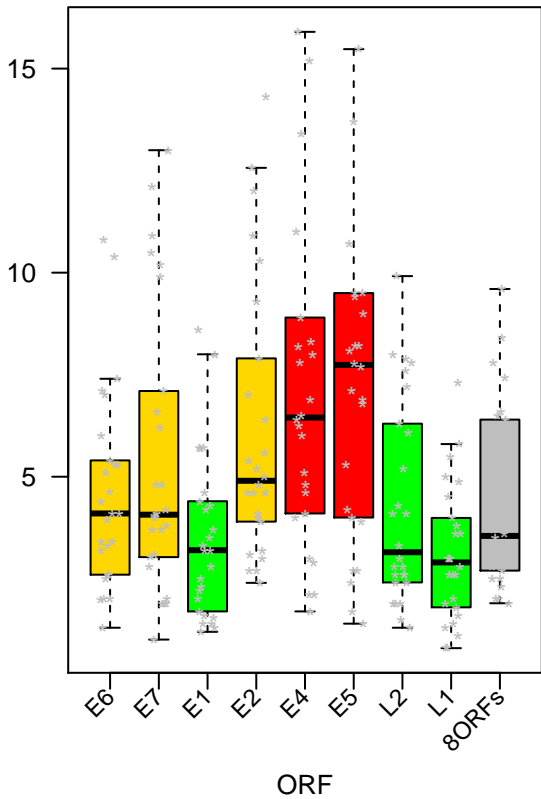

Supplement: NIHMS934365-supplement-2.pdf [file NIHMS934365-supplement-2.pdf]
